# Supplementary material for: Seasonal Changes in the Prevalence of Gestational Diabetes Mellitus
Source: Oxford University Press journal article supplement (doi:10.2337/dc16-0451), 2016-05-10
Supplement: dc160451supplementarydata.pdf [file dc160451supplementarydata.pdf]

SUPPLEMENTARY DATA

**Supplementary Table 1.** The mean monthly temperatures at 0900 hours. The prevalence of GDM (%) with 95% CI according to month. The prevalence of GDM based on the fasting glucose may include women who also had either a raised 1-hour and/or a raised 2-hour glucose result. The prevalence of GDM on the basis of either a raised 1-hour or 2-hour glucose result after exclusion of women with a raised fasting level (n=516). Median (IQR) range of glucose levels (mmol/L) according to month for pregnancy GTT (n = 7,343).

|                                       | Jan              | Feb              | Mar              | Apr              | May              | Jun              | Jul              | Aug              | Sep              | Oct               | Nov              | Dec              | Overall          | p value |
|---------------------------------------|------------------|------------------|------------------|------------------|------------------|------------------|------------------|------------------|------------------|-------------------|------------------|------------------|------------------|---------|
| <b>0900 average monthly temp (°C)</b> | 22.3             | 22.2             | 21.2             | 19.3             | 16.6             | 13.9             | 13               | 14.4             | 16.7             | 18.7              | 19.4             | 21.4             |                  |         |
| <b>Number</b>                         | 674              | 571              | 530              | 586              | 631              | 612              | 672              | 601              | 614              | 638               | 603              | 611              | 7343             |         |
| <b>Prevalence GDM on fasting BGL</b>  | 7.6<br>(5.6–9.6) | 5.6<br>(3.7–7.5) | 5.8<br>(3.8–7.8) | 7.2<br>(5.1–9.3) | 6.8<br>(4.8–8.8) | 5.9<br>(4.0–7.8) | 7.9<br>(5.9–9.9) | 7.0<br>(5.0–9.0) | 7.7<br>(5.6–9.8) | 8.9<br>(7.0–11.1) | 7.1<br>(5.1–9.2) | 6.4<br>(4.5–8.3) | 7.0<br>(6.4–8.3) | 0.57    |
| <b>Median fasting BGL</b>             | 4.4<br>(4.1–4.7) | 4.4<br>(4.1–4.6) | 4.4<br>(4.1–4.6) | 4.4<br>(4.1–4.6) | 4.4<br>(4.2–4.7) | 4.4<br>(4.2–4.7) | 4.4<br>(4.2–4.7) | 4.4<br>(4.2–4.7) | 4.4<br>(4.2–4.7) | 4.5<br>(4.2–4.7)  | 4.4<br>(4.2–4.7) | 4.4<br>(4.2–4.7) | 4.4<br>(4.2–4.7) |         |
| <b>Number</b>                         | 623              | 539              | 499              | 544              | 588              | 576              | 619              | 559              | 566              | 581               | 560              | 572              | 6286             |         |
| <b>Prevalence GDM on 1hr BGL</b>      | 5.0<br>(3.3–6.7) | 4.5<br>(2.8–6.3) | 4.2<br>(2.4–6.0) | 2.6<br>(1.3–3.9) | 3.6<br>(2.1–5.1) | 3.7<br>(2.2–5.2) | 1.9<br>(0.8–3.0) | 2.3<br>(1.1–3.5) | 3.5<br>(2.0–5.0) | 2.2<br>(1.0–3.4)  | 5.2<br>(3.4–7.0) | 4.4<br>(2.7–6.1) | 3.6<br>(3.1–4.0) | 0.02*   |
| <b>Median 1hr BGL</b>                 | 7.0<br>(6.0–8.2) | 7.1<br>(6.1–8.1) | 6.9<br>(6.0–8.3) | 6.9<br>(5.9–8.2) | 6.8<br>(5.8–8.0) | 6.8<br>(5.6–8.1) | 6.8<br>(5.8–8.0) | 6.6<br>(5.6–7.9) | 6.9<br>(5.9–8.1) | 7<br>(5.9–8.3)    | 6.9<br>(5.9–8.2) | 7<br>(5.9–8.3)   | 6.9<br>(5.9–8.1) |         |
| <b>Prevalence GDM on 2hr BGL</b>      | 4.8<br>(3.1–6.5) | 4.6<br>(2.8–6.4) | 4.0<br>(2.3–5.7) | 3.7<br>(2.1–5.3) | 2.6<br>(2.1–5.1) | 3.8<br>(2.2–5.4) | 1.6<br>(0.6–2.6) | 1.8<br>(0.7–2.9) | 3.7<br>(2.1–5.3) | 3.4<br>(1.9–4.9)  | 3.8<br>(2.2–5.4) | 3.8<br>(2.2–5.4) | 3.5<br>(3.1–3.9) | 0.06    |
| <b>Median 2hr BGL</b>                 | 5.9<br>(5.1–6.8) | 5.9<br>(5.1–6.8) | 6.0<br>(5.1–6.9) | 5.9<br>(5.1–6.8) | 5.8<br>(4.9–6.6) | 5.6<br>(4.8–6.6) | 5.7<br>(4.8–6.6) | 5.6<br>(4.9–6.4) | 5.8<br>(5.1–6.7) | 6.0<br>(5.1–6.9)  | 5.9<br>(5.1–6.8) | 5.8<br>(5.0–6.6) | 5.8<br>(5.0–6.7) |         |

\* Post hoc analysis indicates prevalence is 45% higher in November and 46% lower in July that the expected prevalence.
